# Supplementary material
Source: MDPI journal article supplement (https://www.mdpi.com/2624-8549/3/3/56)
Supplement: s1 [file s1]

# **A new supported manganese-based coordination complex as a nano-catalyst for the fast and green synthesis of indazolophthalazinetriones and investigation of its antibacterial activity**

Maryam Ariannezhad,<sup>a\*</sup> Davood Habibi,<sup>a</sup> Somayyeh Heydari,<sup>ab</sup> vahideh khorramabadi,<sup>a</sup>

<sup>a</sup>Department of Organic Chemistry, Faculty of Chemistry, Bu-Ali Sina University, Hamedan, 6517838683, Iran

<sup>b</sup>Department of research and development of the Faran Shimi pharmaceutical company, Tuyserkan, Iran

\*Corresponding author e-mail: mary.ariannezhad@yahoo.com

| Content                  | Page |
|--------------------------|------|
| IR of 2a                 | 3    |
| <sup>1</sup> HNMR of 2a  | 4    |
| <sup>13</sup> CNMR of 2a | 4    |
| IR of 2b                 | 5    |
| <sup>1</sup> HNMR of 2b  | 6    |
| <sup>13</sup> CNMR of 2b | 6    |
| IR of 2c                 | 7    |
| <sup>1</sup> HNMR of 2c  | 8    |
| IR of 2d                 | 9    |
| <sup>1</sup> HNMR of 2d  | 9    |
| <sup>13</sup> CNMR of 2d | 10   |
| IR of 2e                 | 11   |
| <sup>1</sup> HNMR of 2e  | 11   |
| <sup>13</sup> CNMR of 2e | 12   |
| IR of 2f                 | 13   |
| <sup>1</sup> HNMR of 2f  | 14   |
| IR of 2g                 | 15   |
| <sup>1</sup> HNMR of 2g  | 15   |
| IR of 2h                 | 16   |
| <sup>1</sup> HNMR of 2h  | 17   |
| <sup>13</sup> CNMR of 2h | 17   |
| IR of 2i                 | 18   |
| <sup>1</sup> HNMR of 2i  | 19   |
| IR of 2j                 | 20   |
| <sup>1</sup> HNMR of 2j  | 21   |

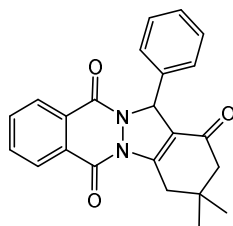

3,4-Dihydro-3,3-Dimethyl-13-(Phenyl)-2H-Indazolo[2,1-b]Phthalazine-1,6,11(13H)-Trione (**2a**)

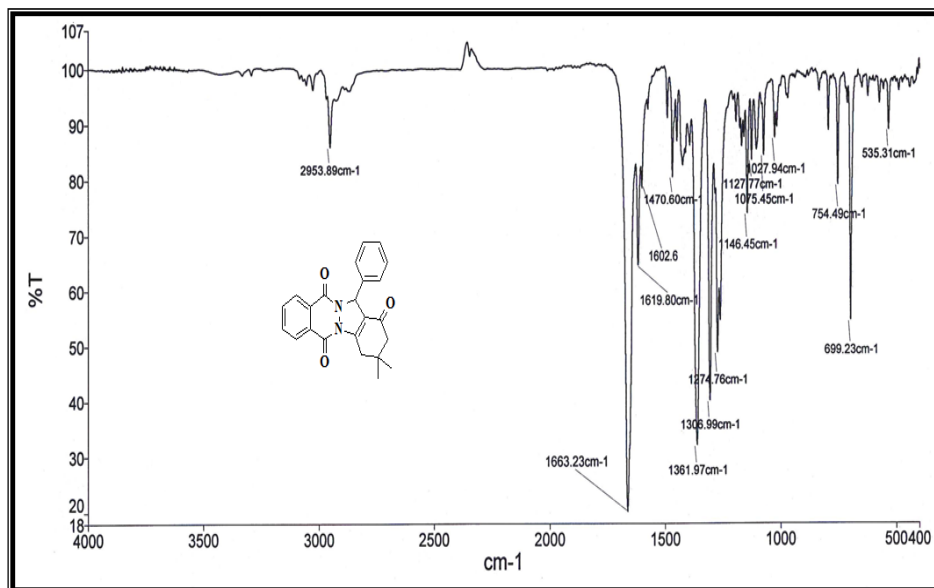

IR of (**2a**)

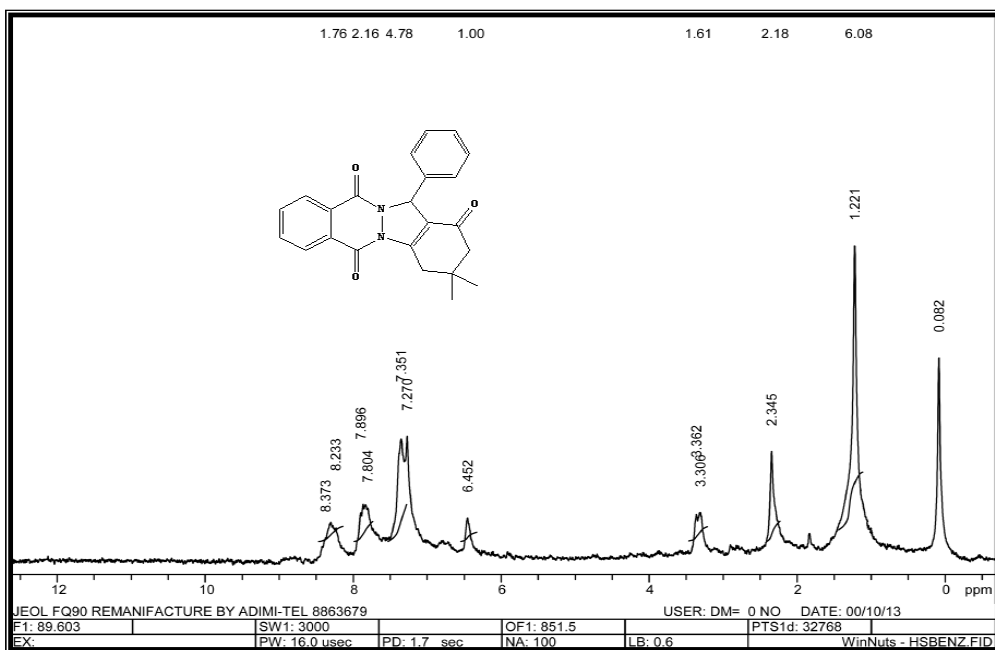

<sup>1</sup>H NMR of (**2a**)

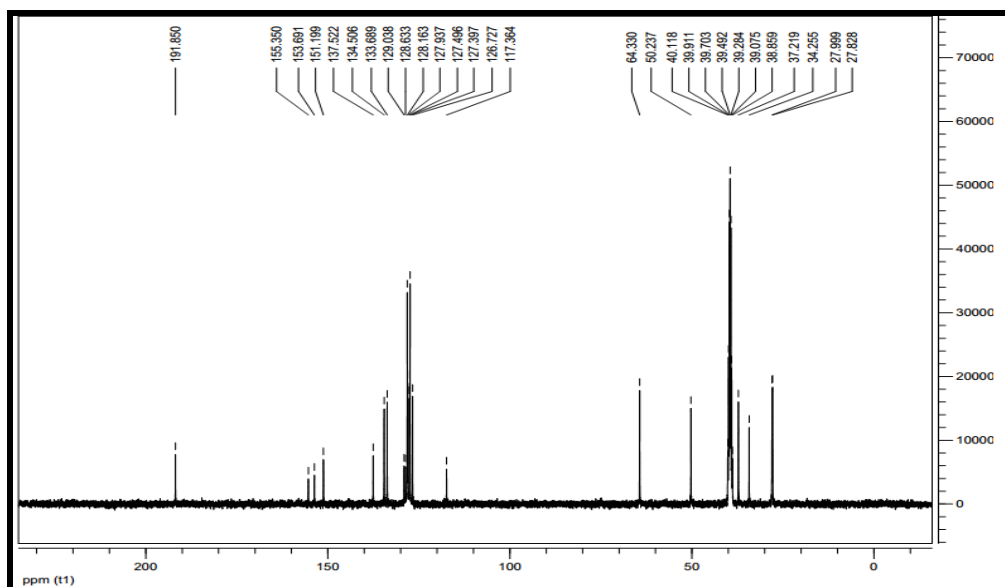

<sup>13</sup>C NMR of (**2a**)

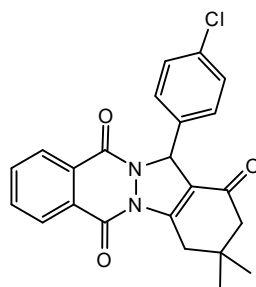

3,4-Dihydro-3,3-Dimethyl-13-(4-Chlorophenyl)-2H-Indazolo[2,1-b]Phthalazine-1,6,11(13H)-Trione (**2b**)

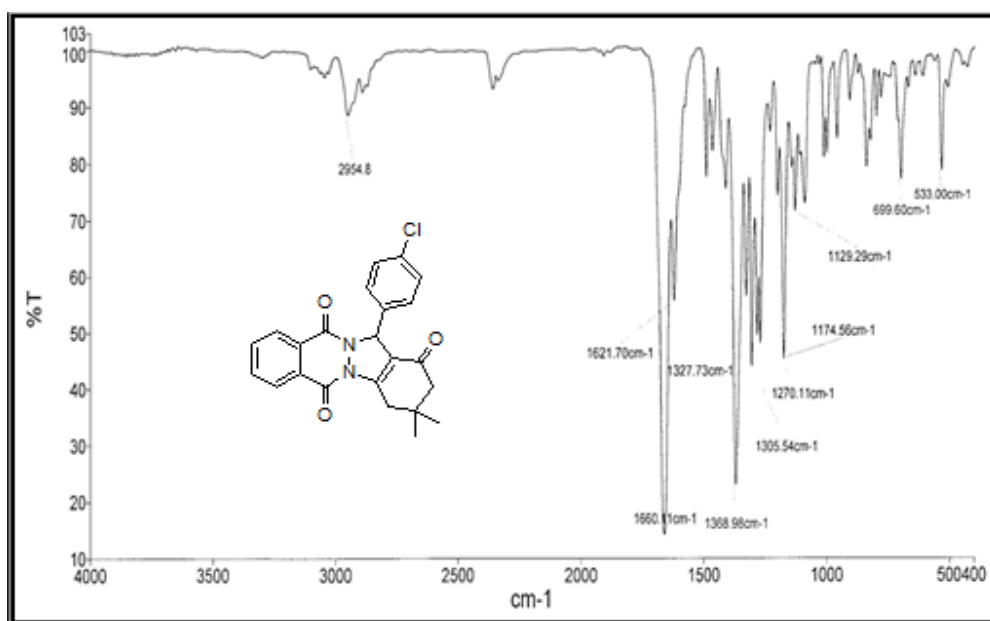

IR of (**2b**)

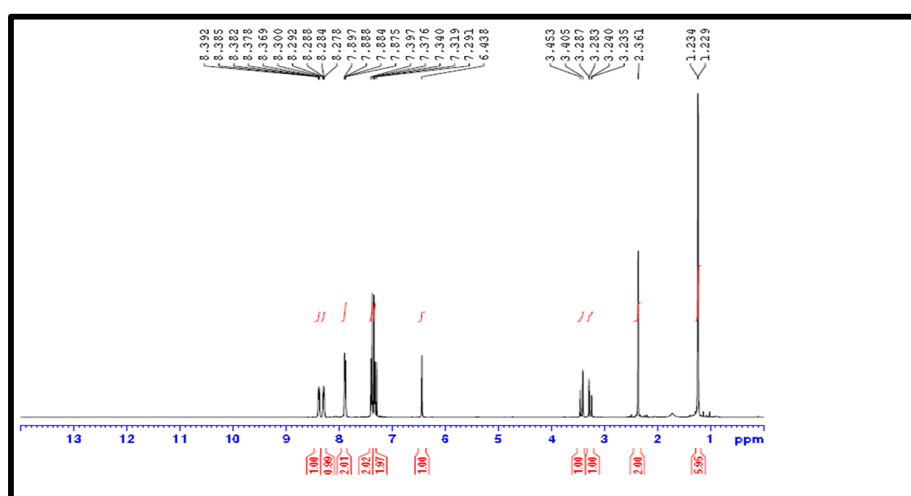

<sup>1</sup>HNMR of (**2b**)

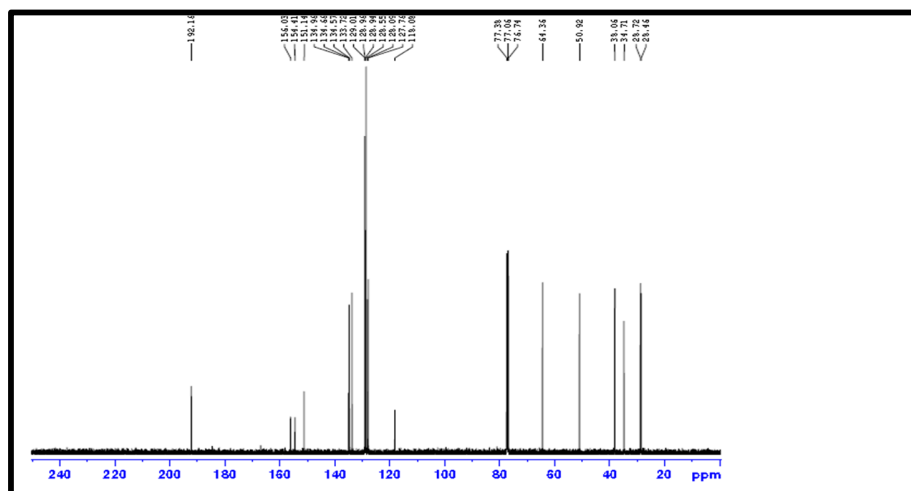

$^{13}\text{C}$ NMR of **(2b)**

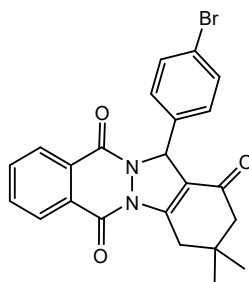

3,4-Dihydro-3,3-Dimethyl-13-(4- Bromo phenyl)-2H-Indazolo[2,1-b]Phthalazine-1,6,11(13H)- Trione (**2c**)



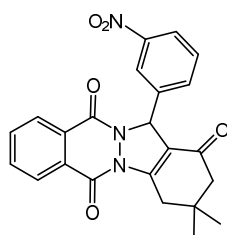

3,4-Dihydro-3,3-Dimethyl-13-(3-Nitrophenyl)-2H-Indazolo[2,1-b]Phthalazine-1,6,11(13H)- Trione (**2d**)

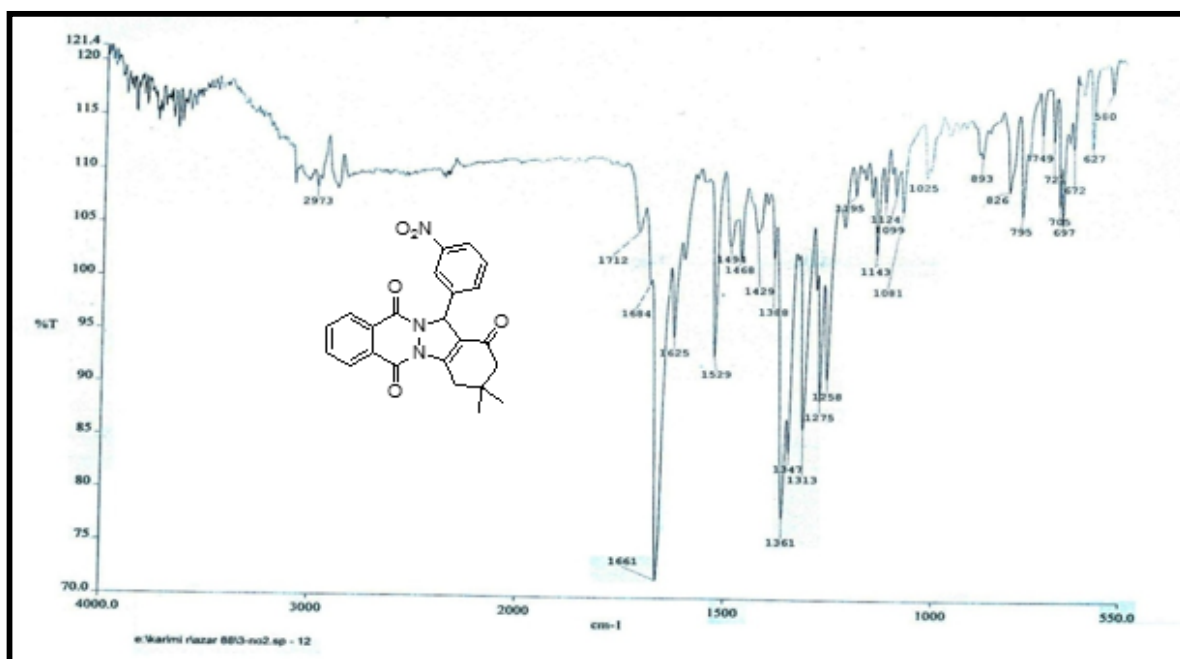

IR of (**2d**)

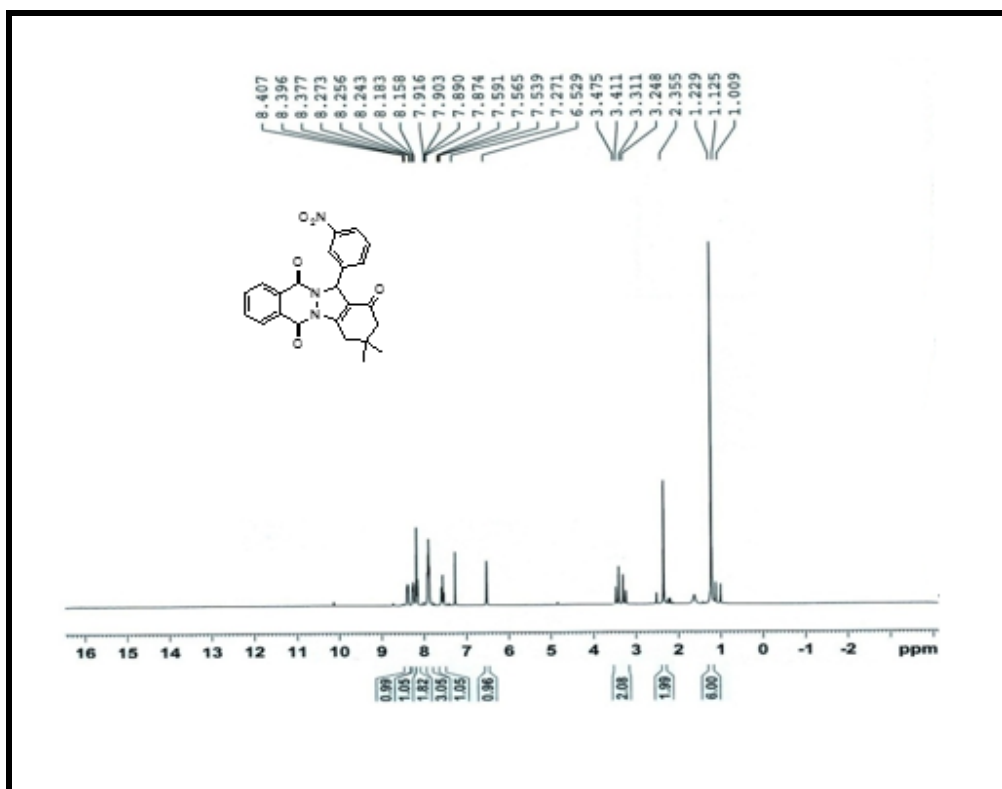

<sup>1</sup>H NMR of (**2d**)

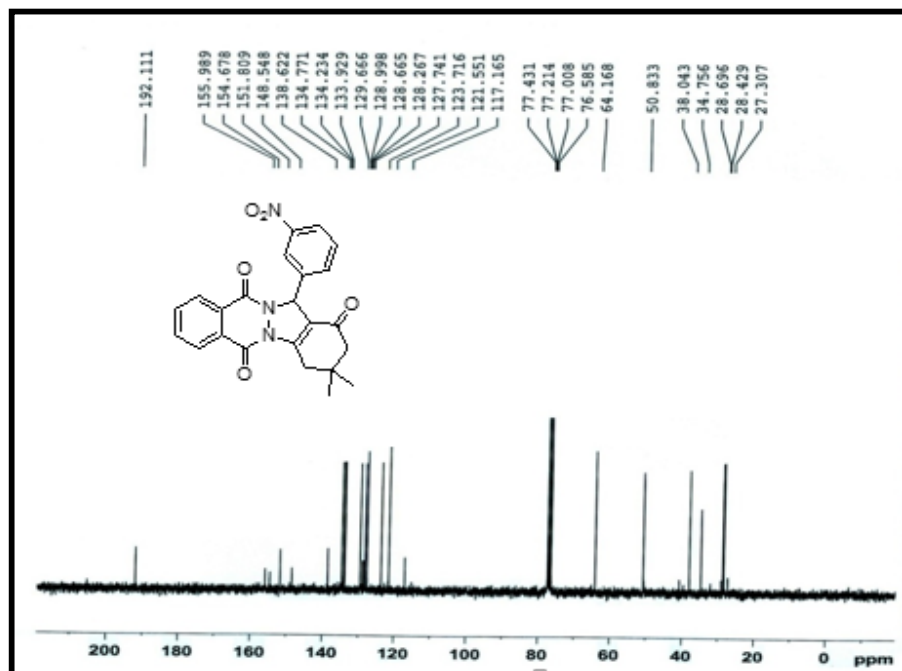

<sup>13</sup>C NMR of (**2d**)



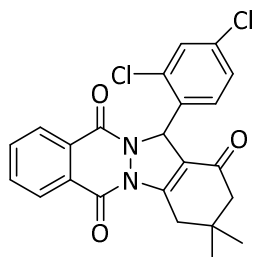

3,4-Dihydro-3,3-Dimethyl-13-(2,4- diChlorophenyl)-2H-Indazolo[2,1-b]Phthalazine-1,6,11(13H)- Trione (**2e**)

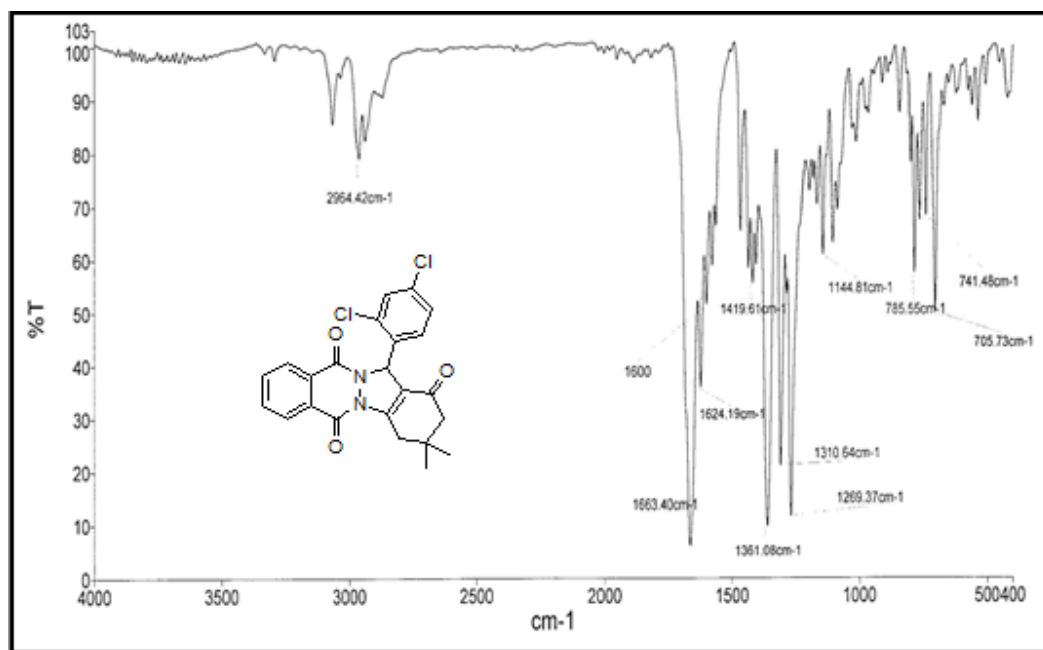

IR of (**2e**)

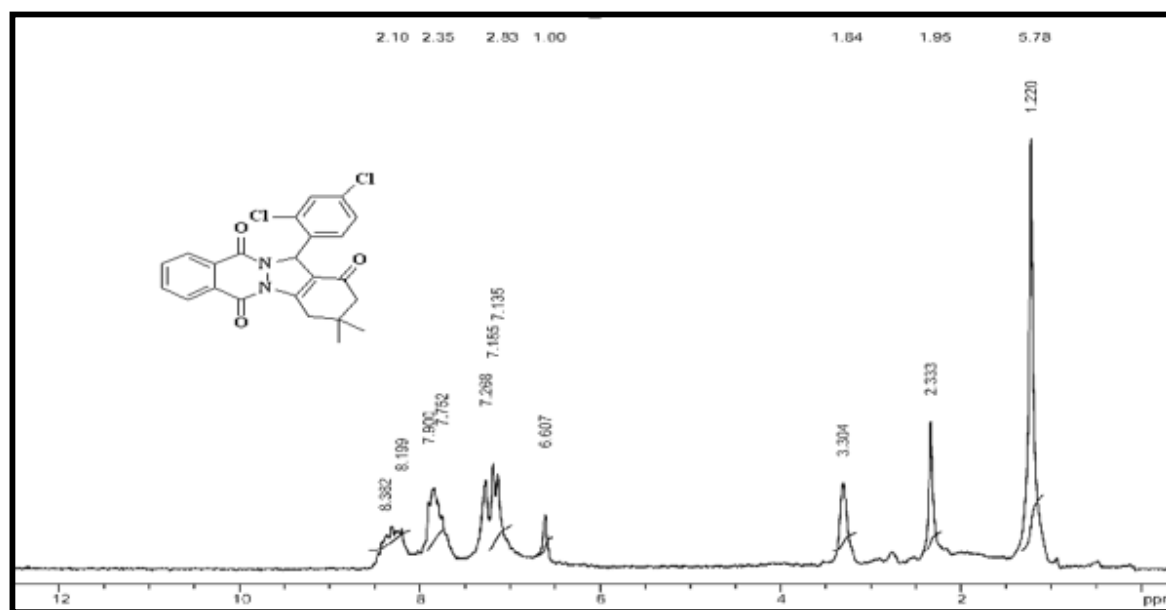

<sup>1</sup>H NMR of (2e)

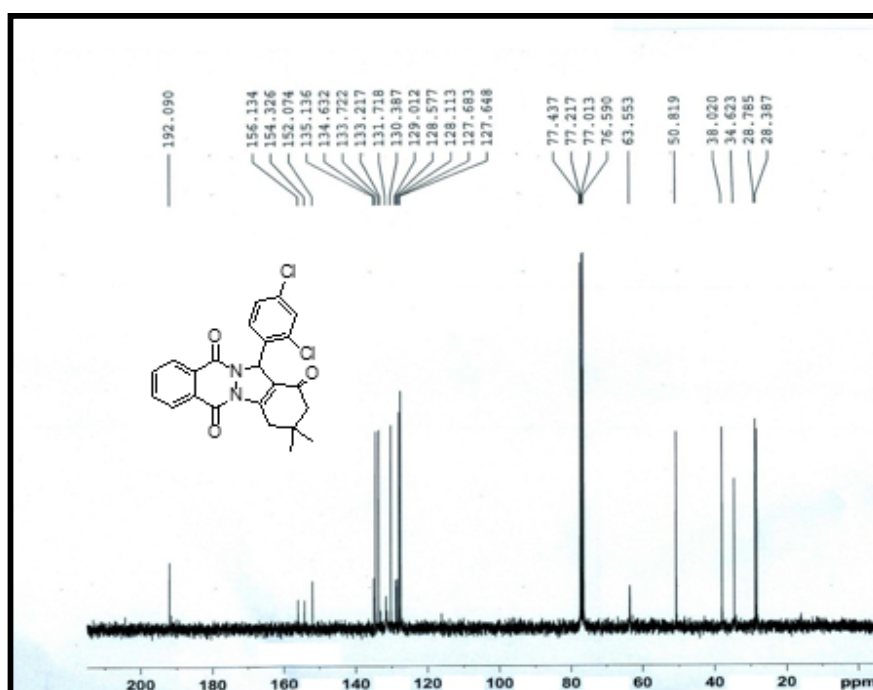

<sup>13</sup>C NMR of (2e)

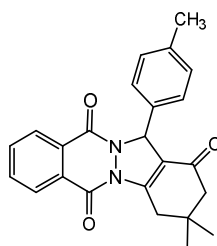

3,4-Dihydro-3,3-Dimethyl-13-(4-Methylphenyl)-2H-Indazolo[2,1-b]Phthalazine-1,6,11(13H)-Trione (**2f**)

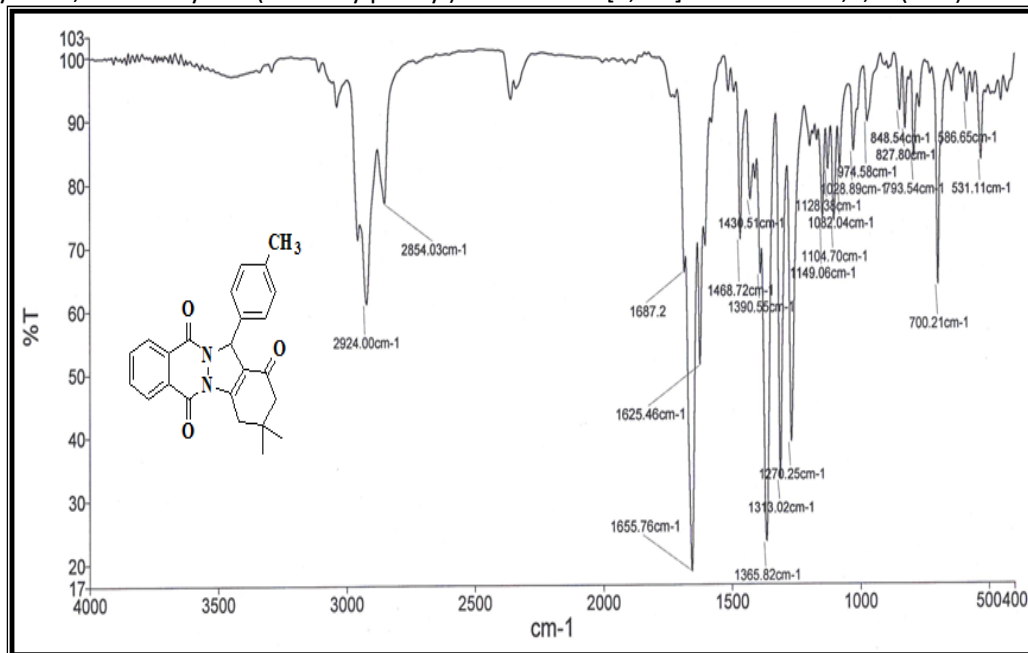

IR of (**2f**)

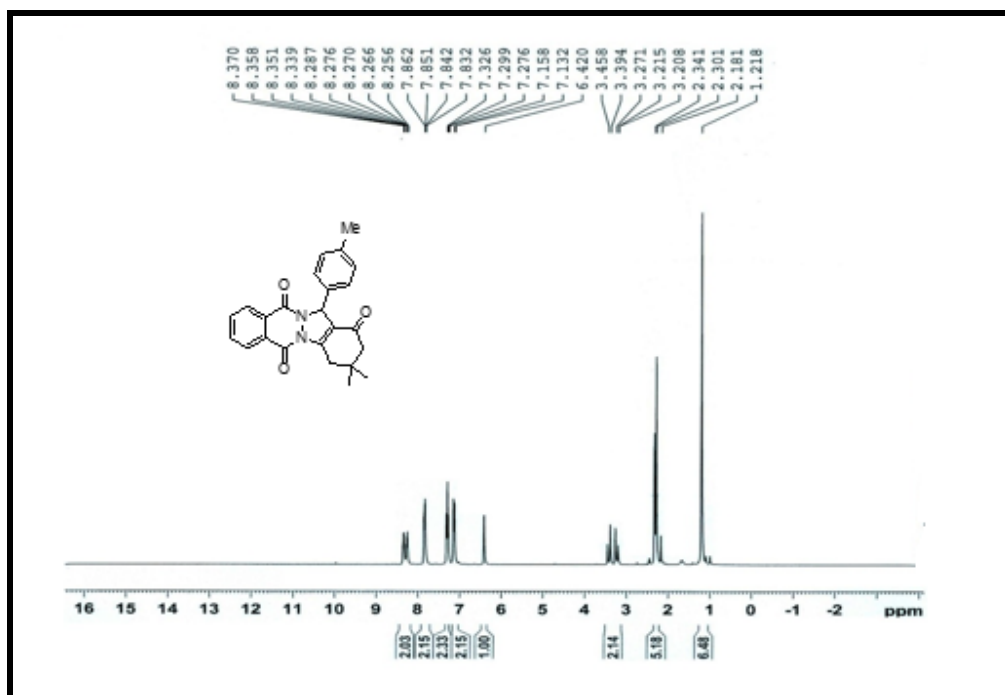

$^1\text{H}$ NMR of (2f)

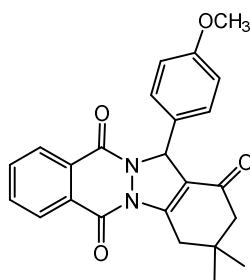

3,4-Dihydro-3,3-Dimethyl-13-(4-Methoxyphenyl)-2H-Indazolo[2,1-b]Phthalazine-1,6,11(13H)-Trione (**2g**)

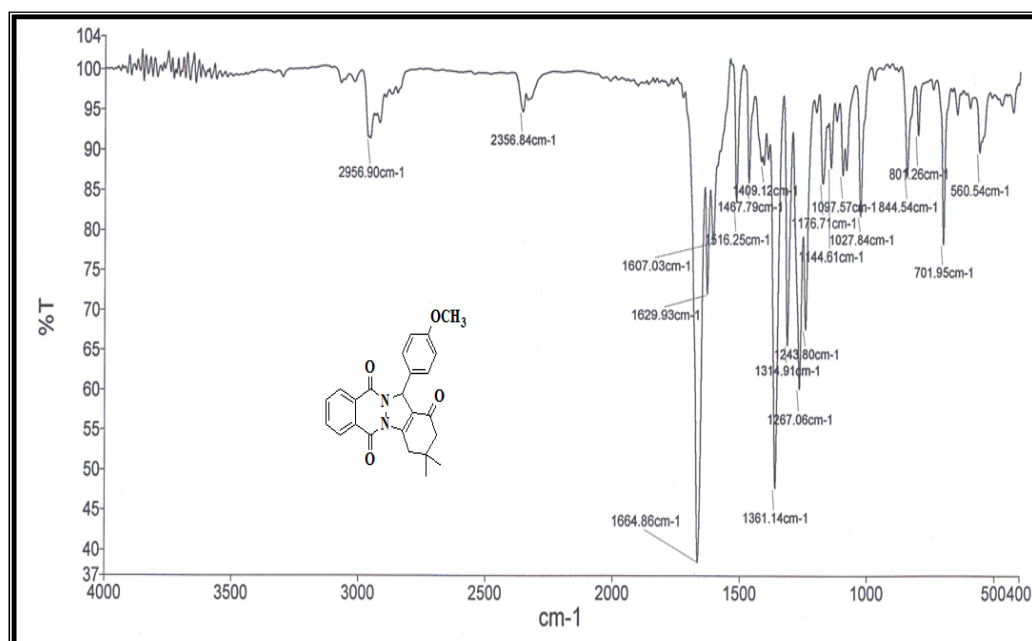

IR of (**2g**)

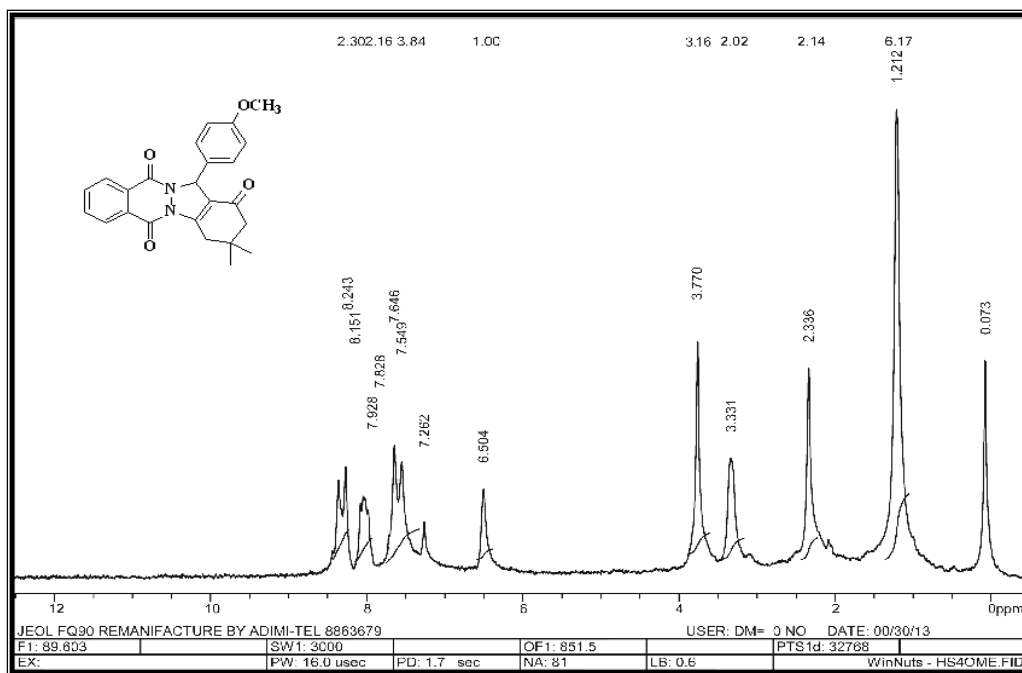

<sup>1</sup>H NMR of (2g)

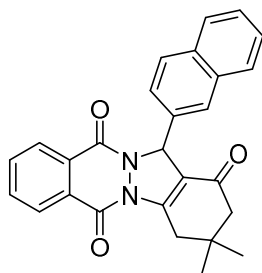

3,4-Dihydro-3,3-Dimethyl-13-(2-eylnaphtalene)-2H-Indazolo[2,1-b]Phthalazine-1,6,11(13H)-Trione (**2h**)

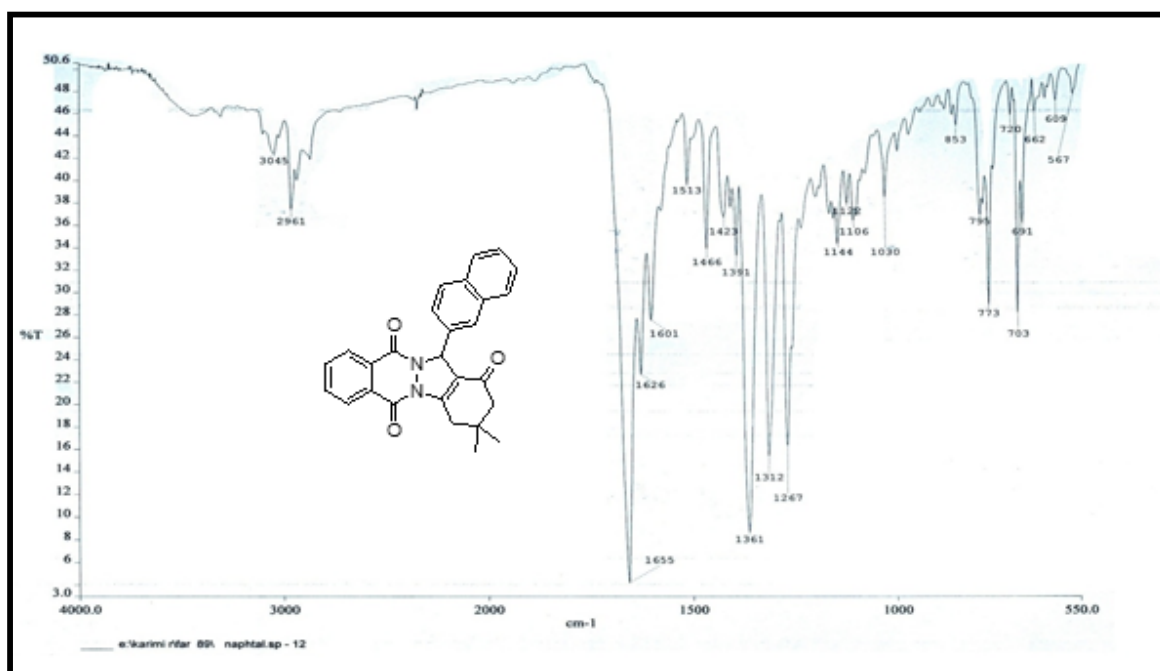

IR of (**2h**)

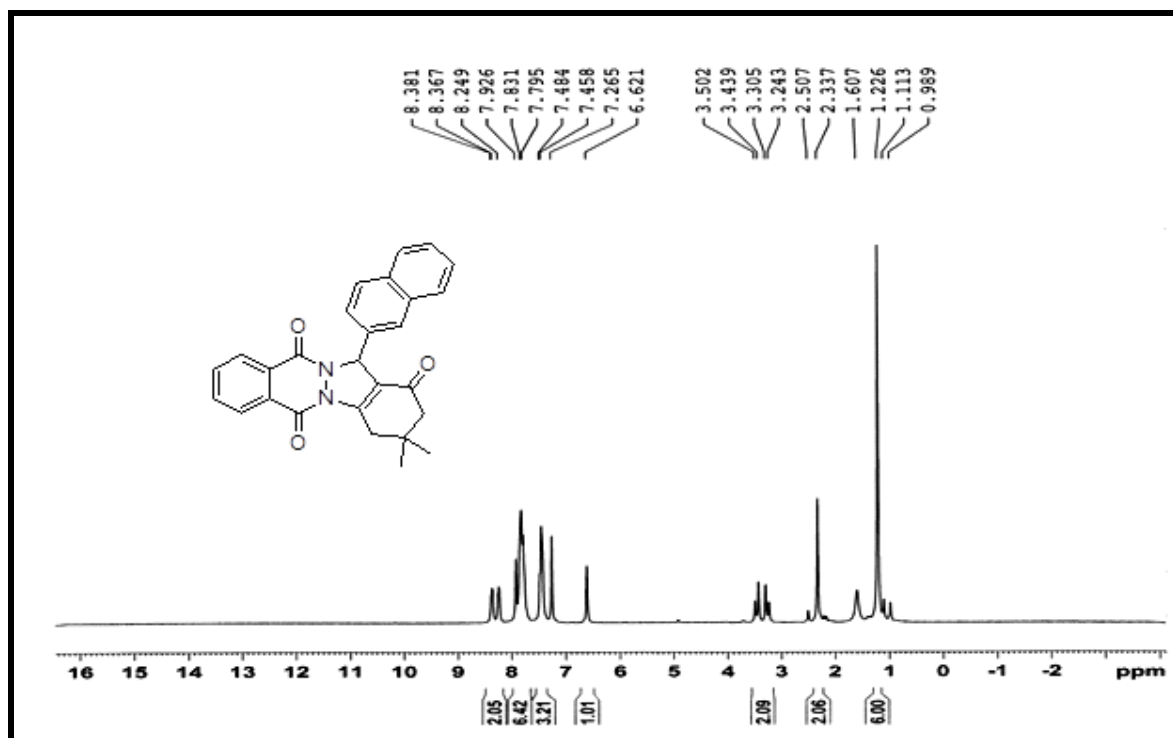

<sup>1</sup>H NMR of (2h)

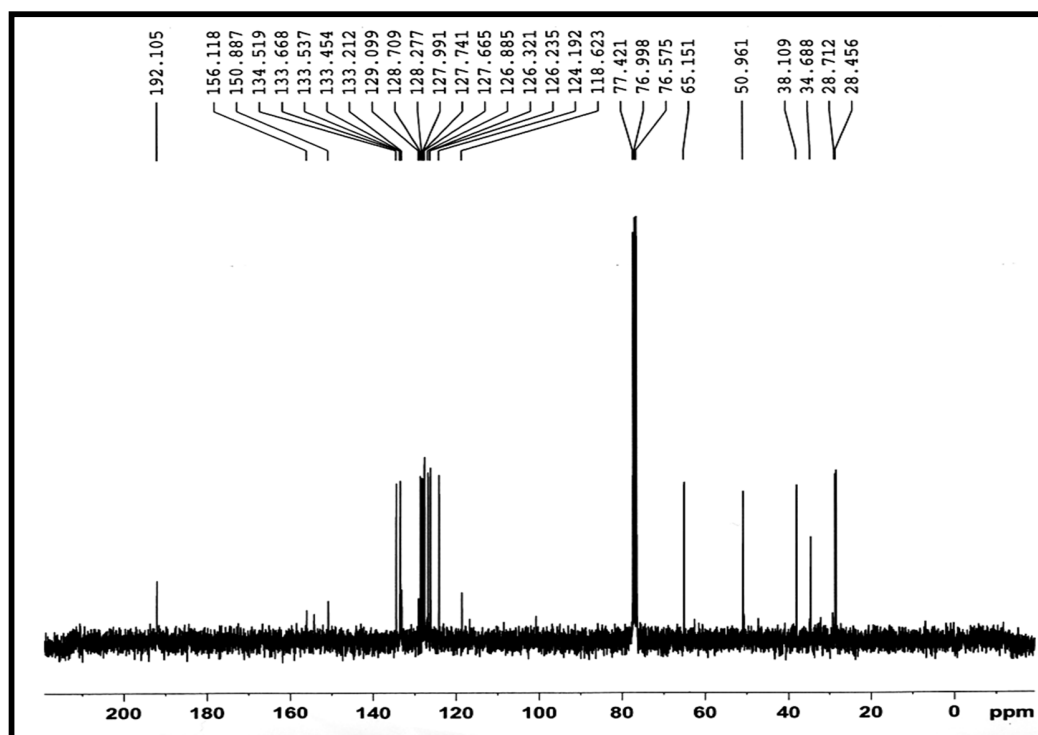

<sup>13</sup>C NMR of (2h)



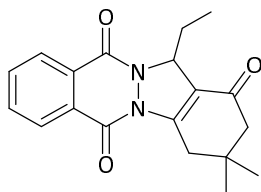

13-Ethyl-3,3-dimethyl-3,4-dihydro-1H-indazolo[1,2-b]phthalazine-1,6,11(2H,13H)-trione(**2i**)

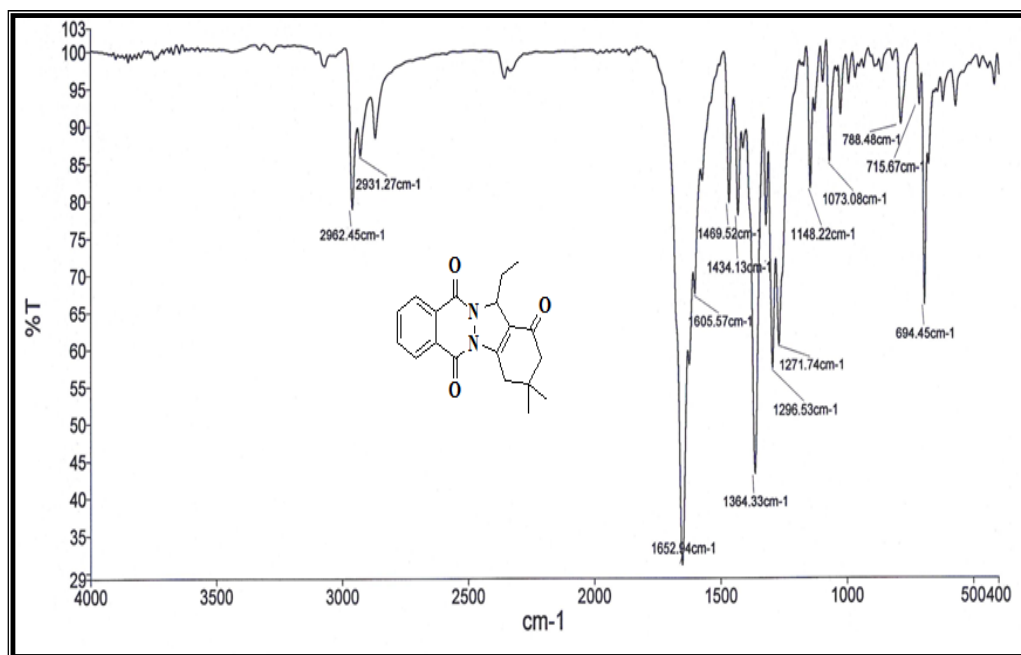

IR of (**2i**)

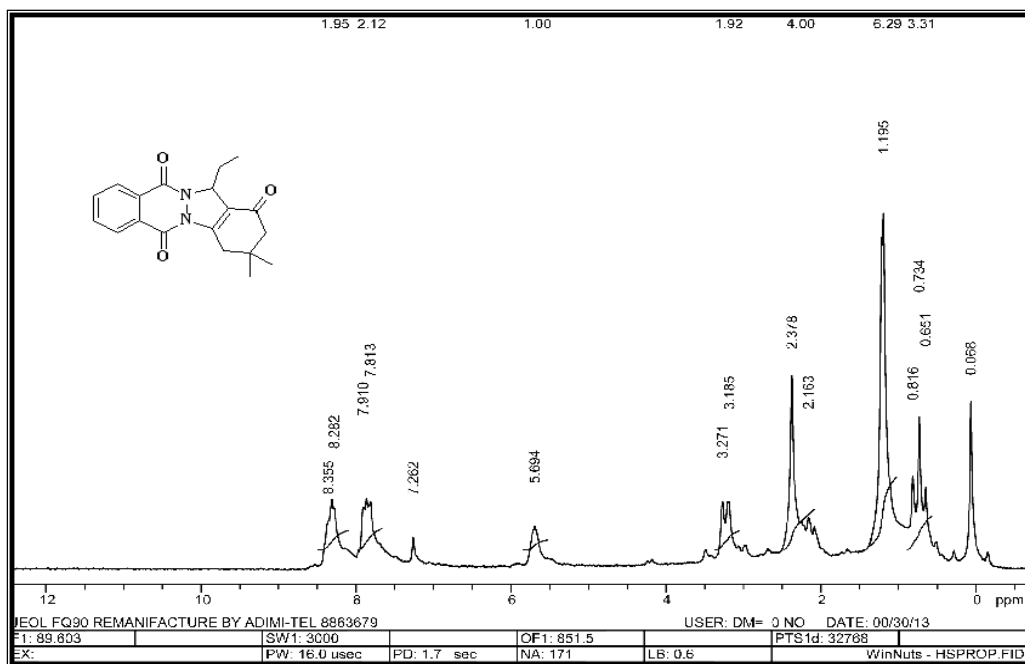

<sup>1</sup>HNMR of (2i)

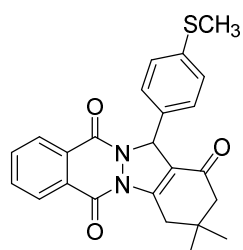

3,4-Dihydro-3,3-Dimethyl-13-(4-thiomethylphenyl)-2H-Indazolo[2,1-b]Phthalazine-1,6,11(13H)-Trione(**2j**)

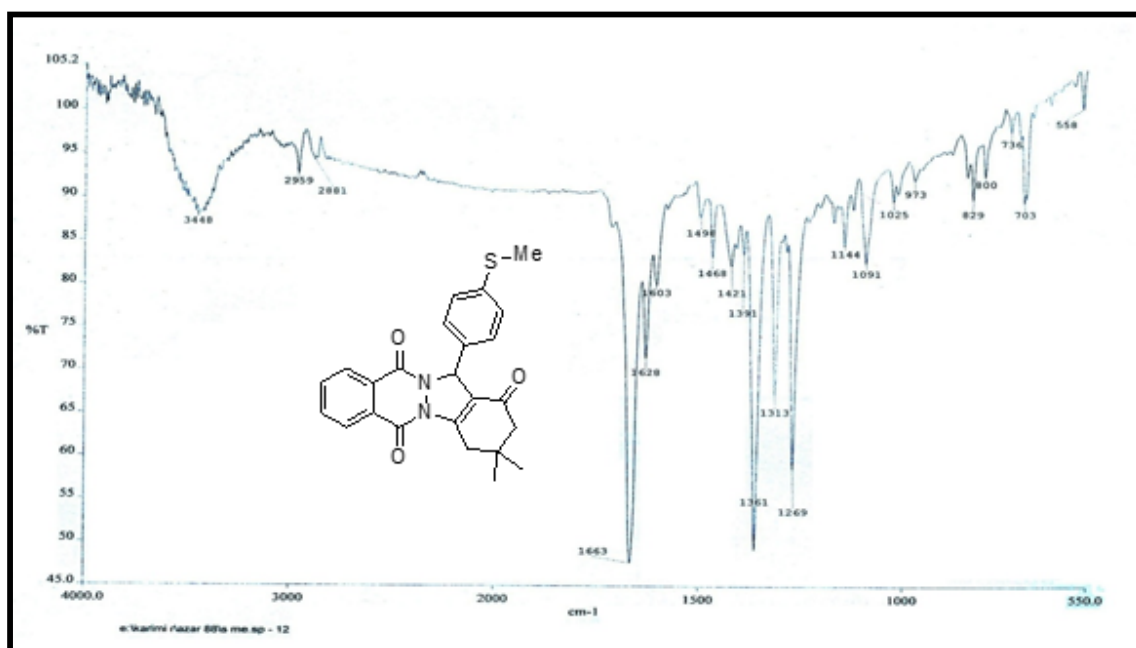

IR of (**2j**)

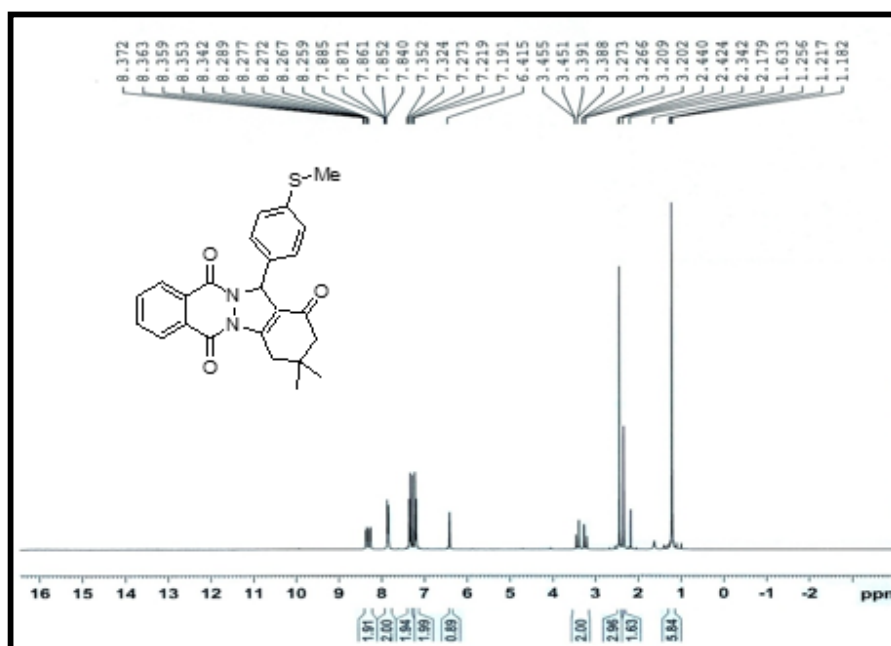

<sup>1</sup>H NMR of (2j)
